# Supplementary material
Source: PubMed Central journal article supplement (PMC6476322)
Supplement: NIHMS1521055-supplement-1.pdf [file NIHMS1521055-supplement-1.pdf]

# Supplementary Figure 1.

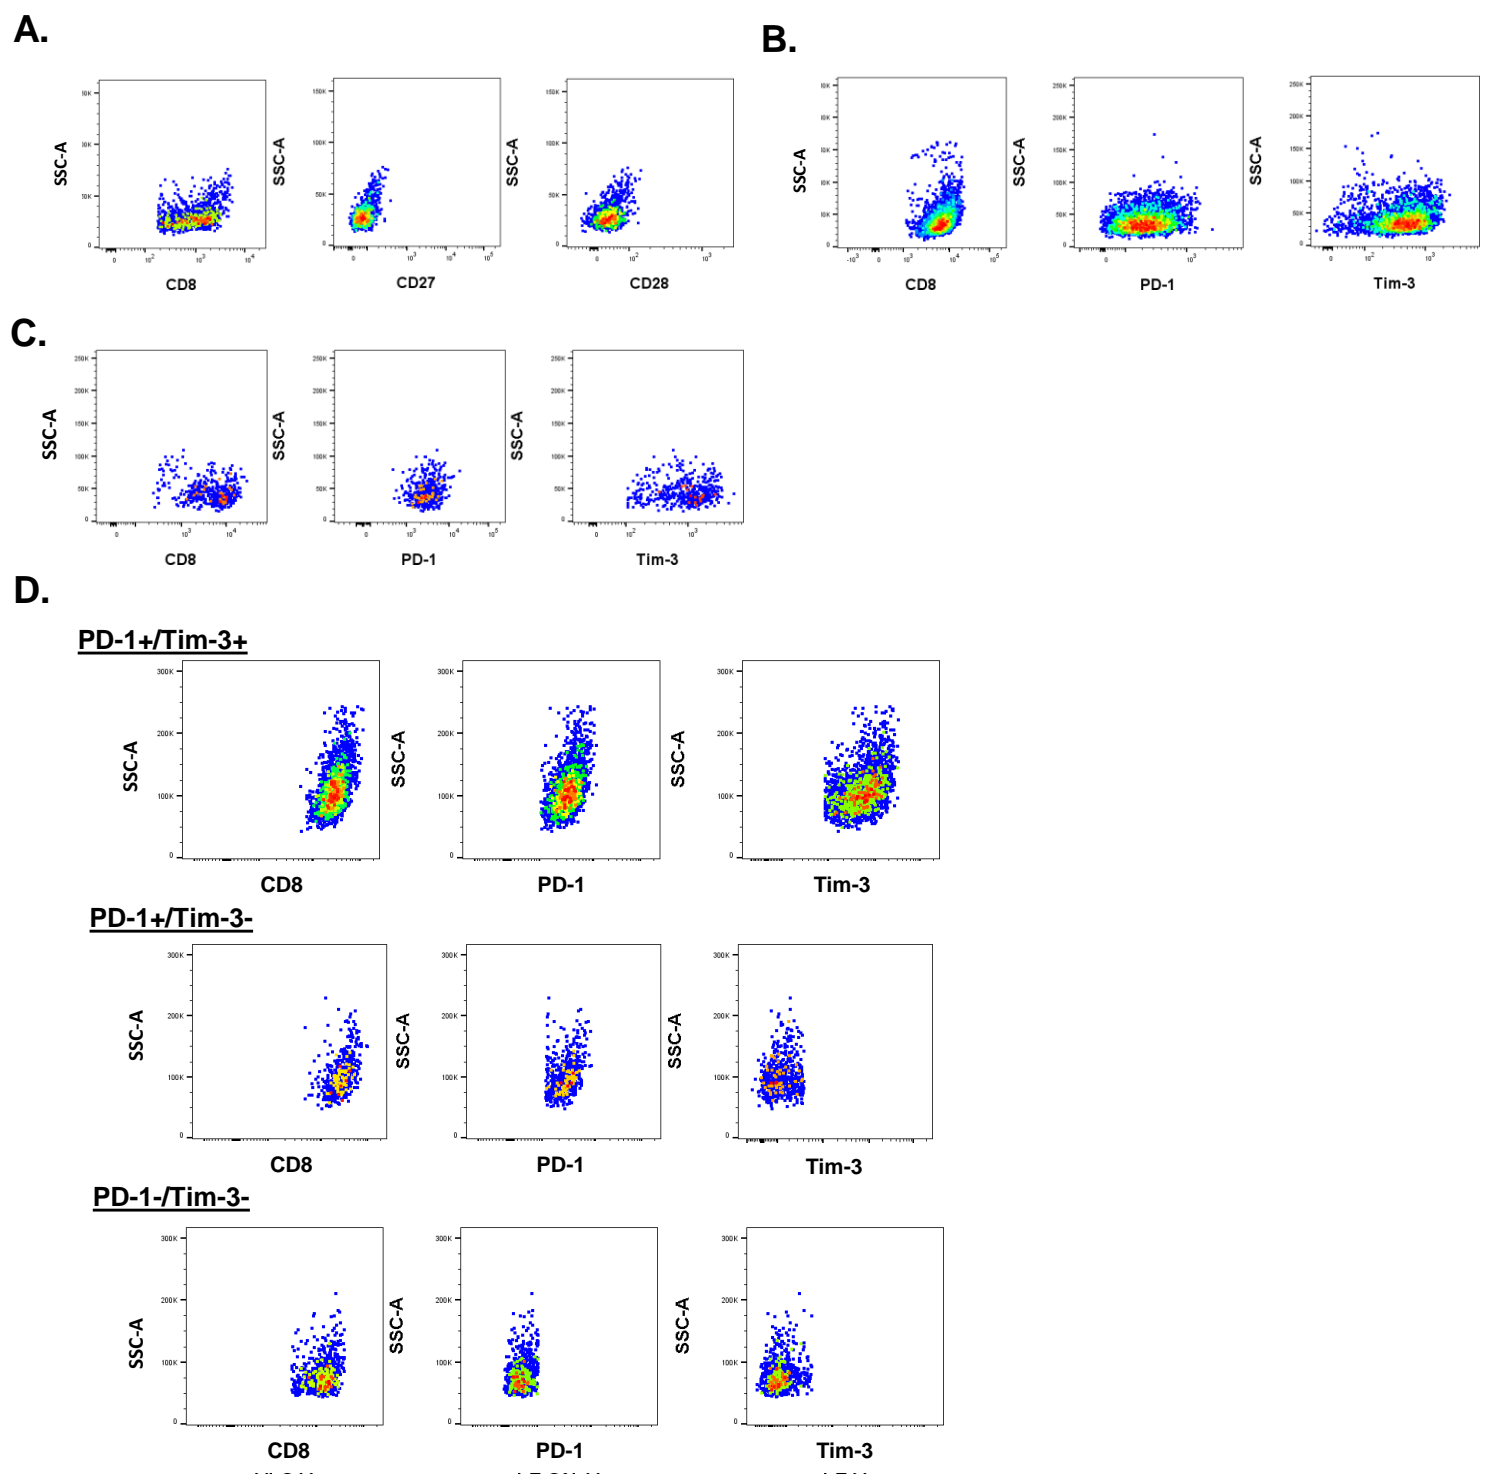

**Supplementary Figure 1 A.** Dot plots displaying ungated staining of CD8+ CD27/CD28- T cells FACS sorted from human SCCHN tumor tissue and used in Figure 1D. **B.** Staining of CD8+ PD-1+ Tim-3+ T cells FACS sorted from dissociated human SCCHN tumor tissue and used in Figure 1E. **C.** Staining of CD8+ T cells purified from dissociated TC-1 tumors by magnetic bead positive selection using the indicated antibodies. **D.** Ungated staining of the PD-1+/Tim-3+, PD-1+/Tim-3-, and PD-1-/Tim-3- cells FACS sorted from CD3+ CD8+ T cells in dissociated TC-1 tumors.
