# Supplementary material
Source: PubMed Central journal article supplement (PMC6476322)
Supplement: NIHMS1521055-supplement-5.pdf [file NIHMS1521055-supplement-5.pdf]

# Supplementary Figure 5.

## Responder cells

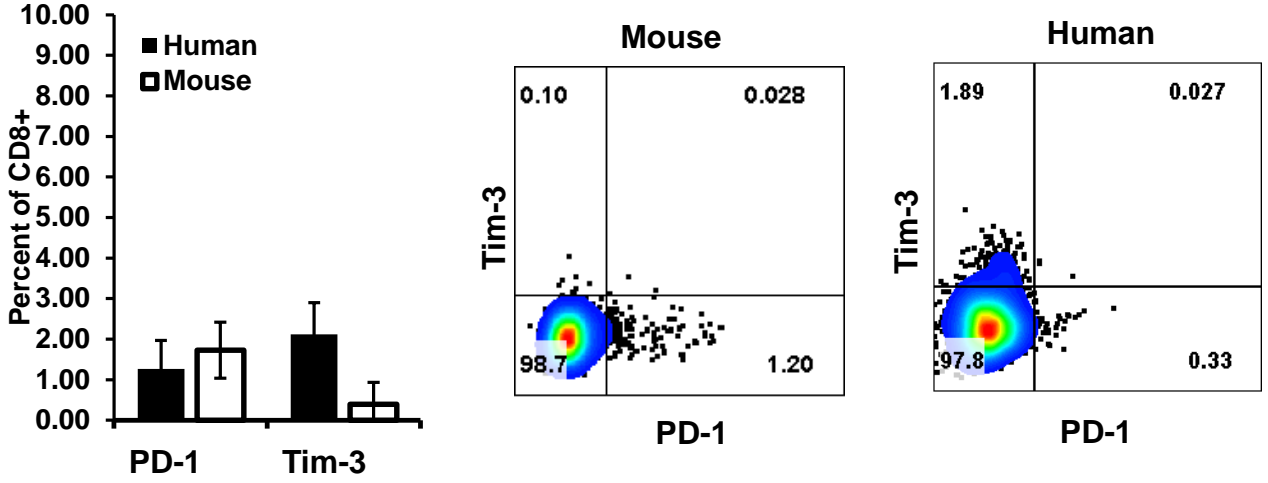

**Supplementary Figure 5.** Pan T cells were isolated from human patient PBMC or mouse splenocytes using negative magnetic bead selection. Cells were then stained for CD3 CD8 PD-1 and Tim-3 and analyzed by FACS. Dot plots on the left are gated on CD3+ CD8+ cells. Bar graph on the left is representative of five patients or mice.
