# Supplementary material
Source: PubMed Central journal article supplement (PMC6476322)
Supplement: NIHMS1521055-supplement-7.pdf [file NIHMS1521055-supplement-7.pdf]

# Supplementary Figure 7.

## Mouse TC-1 Tumor TIL

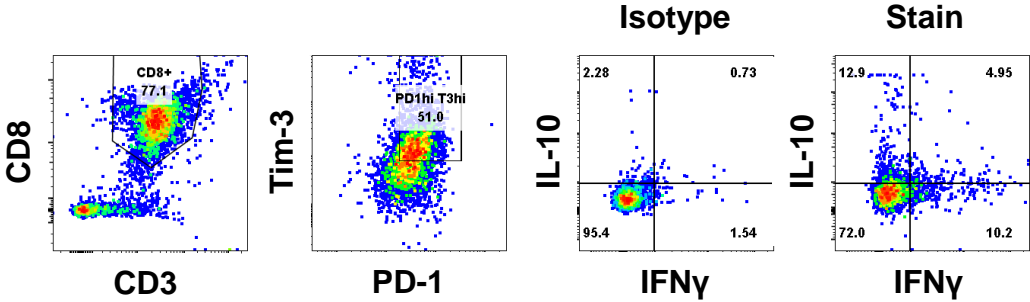

**Supplementary Figure 7.** CD3+ CD8+ PD-1+ Tim-3+ T cells were FACS sorted from dissociated TC-1 tumor grown in C57BL/6 mice. Sorted T cells were then stimulated for 12h *in vitro* in 96-well plates coated with anti-CD3 and anti-CD28. Golgistop<sup>tm</sup> was added to the culture to arrest vessicle exocytosis. Cells were then permeabilized and stained for IL-10 and IFNγ or isotype control antibodies used at the same concentration.
